# Supplementary material for: Bioactive Compound Profiling of Olive Fruit: The Contribution of Genotype
Source: MDPI journal article supplement (doi:10.3390/antiox11040672), 2022-03-30
Supplement: s1 [file s1]

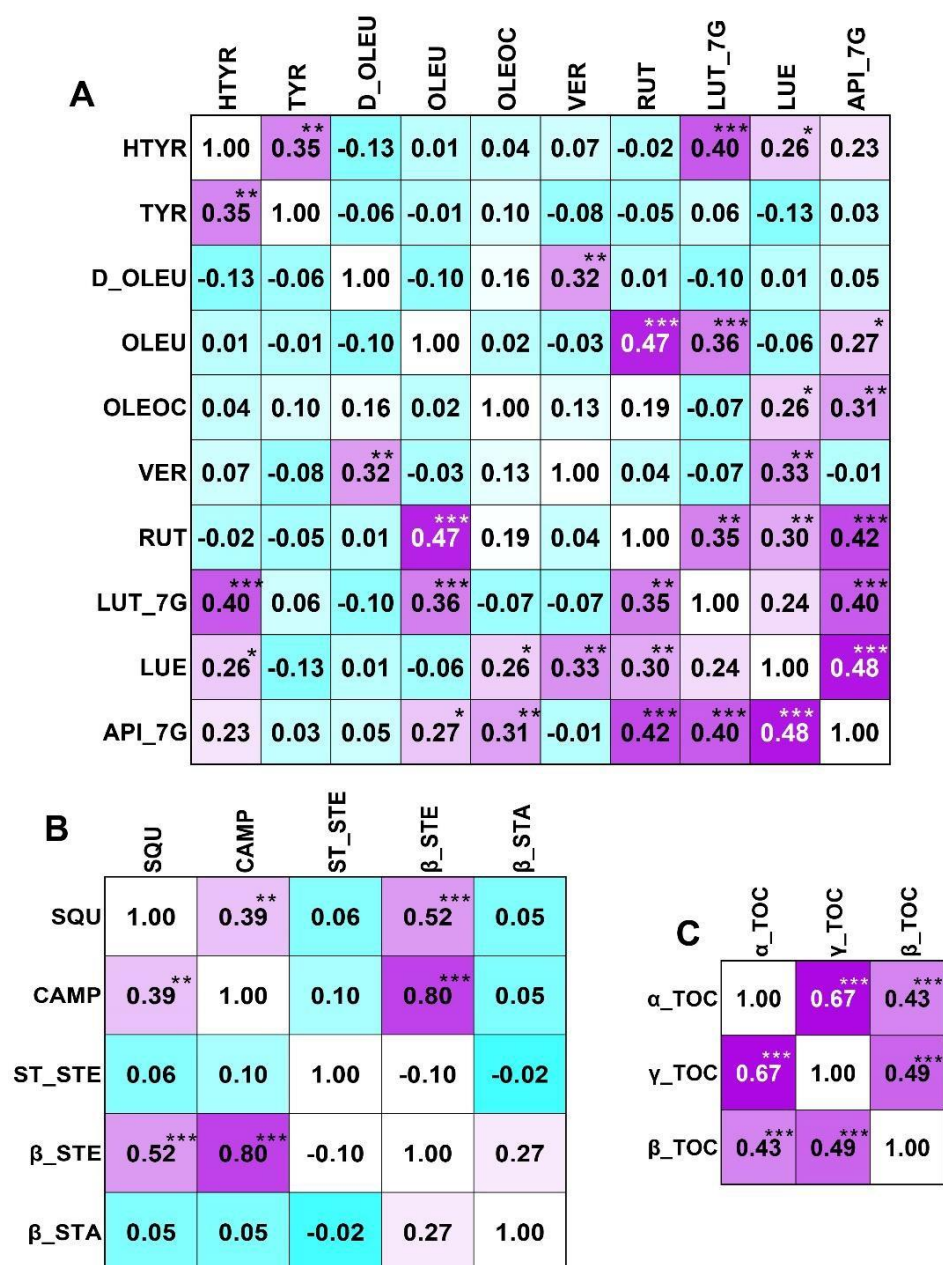

**Figure S1.** Pearson's correlation coefficients among the phenolic compounds (A); squalene and sterols (B); and tocopherols (C) from all genotypes in two consecutive crop seasons. The violet color indicates the significant data and the light blue color is for non-significant data. The asterisk indicates \*\*\*  $p \leq 0.000$ , \*\*  $p < 0.01$ , and \*  $p < 0.05$ .

**Table S1:** List of olive cultivars from IOGC.

| Cultivar              | Country of origin |
|-----------------------|-------------------|
| Arauco                | Argentina         |
| Arbequina             | Spain             |
| Arbosana              | Spain             |
| Biancolilla           | Italy             |
| Branquita             | Spain             |
| Bujuk Topakislak      | Turkey            |
| Canino                | Italy             |
| Carolea               | Italy             |
| Chalkidikis           | Greece            |
| Changlot Real         | Spain             |
| Chemlali              | Tunisia           |
| Chetoui               | Tunisia           |
| Cipressino            | Italy             |
| Coratina              | Italy             |
| Domat                 | Turkey            |
| Dritta                | Italy             |
| Empeltre              | Spain             |
| Fishomi               | Iran              |
| Frantoio              | Italy             |
| Galega Vulgar         | Portugal          |
| Gordal Sevillana      | Spain             |
| Hojiblanca            | Spain             |
| Istarska Belica       | Croatia           |
| Izmir Sofralik        | Turkey            |
| Kalamata              | Greece            |
| Konservolia           | Greece            |
| Koroneiki             | Greece            |
| Lastovka              | Croatia           |
| Leccino               | Italy             |
| Leccio del Corno      | Italy             |
| Lechin de Sevilla     | Spain             |
| Majorca               | Italy             |
| Manzanilla de Jaen    | Spain             |
| Manzanilla de Sevilla | Spain             |
| Maurino               | Italy             |
| Memecik               | Turkey            |
| Meski                 | Tunisia           |
| Moraiolo              | Italy             |
| Moresca               | Italy             |
| Morisca               | Spain             |
| Morrut                | Spain             |
| Nocellara del Belice  | Italy             |
| Nociara               | Italy             |
| Oblica                | Croatia           |

|                     |         |
|---------------------|---------|
| Passalunara         | Italy   |
| Pendolino           | Italy   |
| Peranzana           | Italy   |
| Picholine Languedoc | France  |
| Picholine Marocaine | Morocco |
| Picual              | Spain   |
| Picudo              | Spain   |
| Pizz'e Carroga      | Italy   |
| Rowghani            | Iran    |
| Salonenque          | France  |
| Tanche              | France  |
| Tonda Iblea         | Italy   |
| Uovo di Piccione    | Italy   |
| Vera                | Italy   |
| Verdale             | France  |
| Zaity               | Syria   |
| Zard                | Iran    |

---

**Table S2.** Descriptive statistics of phenols (expressed as mg kg<sup>-1</sup> of fresh fruit pulp) in 61 cultivars and two consecutive crop seasons.

| <b>Cultivar</b>  | <b>Descriptive statistics</b> | <b>HTYR</b> | <b>TYR</b> | <b>D OLEU</b> | <b>OLEU</b>  | <b>OLEOC</b> | <b>VER</b>  | <b>RUT</b>  | <b>LUT 7G</b> | <b>LUE</b> | <b>API 7G</b> | <b>Total ph*</b> | <b>Total STD**</b> |
|------------------|-------------------------------|-------------|------------|---------------|--------------|--------------|-------------|-------------|---------------|------------|---------------|------------------|--------------------|
| Arauco           | Mean                          | 820         | 160        | 136           | 10748        | 347          | 59          | 912         | 729           | 39         | 266           | 14,216           |                    |
|                  | <b>STD</b>                    | <b>15</b>   | <b>60</b>  | <b>40</b>     | <b>1456</b>  | <b>10</b>    | <b>27</b>   | <b>210</b>  | <b>92</b>     | <b>1</b>   | <b>55</b>     |                  | <b>447</b>         |
| Arbequina        | Mean                          | 291         | 207        | 11556         | 692          | 528          | 448         | 1427        | 659           | 133        | 209           | 16,149           |                    |
|                  | <b>STD</b>                    | <b>221</b>  | <b>99</b>  | <b>10022</b>  | <b>147</b>   | <b>139</b>   | <b>242</b>  | <b>213</b>  | <b>148</b>    | <b>160</b> | <b>70</b>     |                  | <b>3119</b>        |
| Arbosana         | Mean                          | 224         | 97         | 490           | 593          | 323          | 603         | 3023        | 351           | 164        | 125           | 5,994            |                    |
|                  | <b>STD</b>                    | <b>36</b>   | <b>0</b>   | <b>73</b>     | <b>227</b>   | <b>182</b>   | <b>173</b>  | <b>211</b>  | <b>48</b>     | <b>14</b>  | <b>52</b>     |                  | <b>87</b>          |
| Biancolilla      | Mean                          | 205         | 91         | 973           | 5224         | 215          | 2129        | 1742        | 375           | 99         | 83            | 11,135           |                    |
|                  | <b>STD</b>                    | <b>22</b>   | <b>9</b>   | <b>71</b>     | <b>668</b>   | <b>22</b>    | <b>32</b>   | <b>77</b>   | <b>38</b>     | <b>1</b>   | <b>3</b>      |                  | <b>203</b>         |
| Branquita        | Mean                          | 320         | 185        | 13957         | 8577         | 1298         | 1093        | 2117        | 296           | 57         | 310           | 28,209           |                    |
|                  | <b>STD</b>                    | <b>167</b>  | <b>23</b>  | <b>14146</b>  | <b>11052</b> | <b>1223</b>  | <b>195</b>  | <b>411</b>  | <b>171</b>    | <b>31</b>  | <b>16</b>     |                  | <b>5257</b>        |
| Buyuk Topakislak | Mean                          | 447         | 141        | 337           | 4933         | 1230         | 96          | 588         | 191           | 72         | 183           | 8,216            |                    |
|                  | <b>STD</b>                    | <b>485</b>  | <b>76</b>  | <b>371</b>    | <b>2508</b>  | <b>1457</b>  | <b>124</b>  | <b>53</b>   | <b>39</b>     | <b>17</b>  | <b>173</b>    |                  | <b>819</b>         |
| Canino           | Mean                          | 1203        | 129        | 3179          | 4183         | 571          | 1564        | 1586        | 660           | 334        | 348           | 13,759           |                    |
|                  | <b>STD</b>                    | <b>1388</b> | <b>56</b>  | <b>901</b>    | <b>442</b>   | <b>274</b>   | <b>869</b>  | <b>330</b>  | <b>79</b>     | <b>91</b>  | <b>200</b>    |                  | <b>446</b>         |
| Carolea          | Mean                          | 638         | 142        | 460           | 9972         | 588          | 486         | 1312        | 457           | 163        | 223           | 14,442           |                    |
|                  | <b>STD</b>                    | <b>196</b>  | <b>79</b>  | <b>3</b>      | <b>10076</b> | <b>49</b>    | <b>650</b>  | <b>148</b>  | <b>115</b>    | <b>190</b> | <b>112</b>    |                  | <b>3137</b>        |
| Chalkidikis      | Mean                          | 789         | 480        | 93            | 10112        | 367          | 299         | 1413        | 607           | 28         | 335           | 14,524           |                    |
|                  | <b>STD</b>                    | <b>98</b>   | <b>86</b>  | <b>1</b>      | <b>6202</b>  | <b>84</b>    | <b>52</b>   | <b>571</b>  | <b>317</b>    | <b>2</b>   | <b>213</b>    |                  | <b>1919</b>        |
| Changlot Real    | Mean                          | 363         | 312        | 158           | 10037        | 562          | 78          | 379         | 318           | 52         | 150           | 12,409           |                    |
|                  | <b>STD</b>                    | <b>66</b>   | <b>124</b> | <b>166</b>    | <b>8002</b>  | <b>70</b>    | <b>3</b>    | <b>157</b>  | <b>156</b>    | <b>49</b>  | <b>60</b>     |                  | <b>2501</b>        |
| Chemlali         | Mean                          | 343         | 190        | 1092          | 3216         | 962          | 481         | 1843        | 395           | 24         | 202           | 8,747            |                    |
|                  | <b>STD</b>                    | <b>21</b>   | <b>109</b> | <b>126</b>    | <b>800</b>   | <b>19</b>    | <b>40</b>   | <b>211</b>  | <b>112</b>    | <b>10</b>  | <b>81</b>     |                  | <b>236</b>         |
| Chetoui          | Mean                          | 333         | 165        | 1080          | 7075         | 529          | 195         | 599         | 319           | 20         | 101           | 10,415           |                    |
|                  | <b>STD</b>                    | <b>256</b>  | <b>106</b> | <b>226</b>    | <b>1970</b>  | <b>76</b>    | <b>179</b>  | <b>35</b>   | <b>87</b>     | <b>5</b>   | <b>33</b>     |                  | <b>594</b>         |
| Cipressino       | Mean                          | 364         | 425        | 327           | 12720        | 466          | 213         | 1836        | 256           | 46         | 185           | 16,838           |                    |
|                  | <b>STD</b>                    | <b>309</b>  | <b>296</b> | <b>298</b>    | <b>7584</b>  | <b>71</b>    | <b>280</b>  | <b>1112</b> | <b>110</b>    | <b>10</b>  | <b>56</b>     |                  | <b>2330</b>        |
| Coratina         | Mean                          | 193         | 165        | 9341          | 7615         | 960          | 5988        | 983         | 301           | 130        | 172           | 25,849           |                    |
|                  | <b>STD</b>                    | <b>150</b>  | <b>68</b>  | <b>12443</b>  | <b>4349</b>  | <b>819</b>   | <b>2002</b> | <b>433</b>  | <b>142</b>    | <b>45</b>  | <b>18</b>     |                  | <b>3898</b>        |
| Domat            | Mean                          | 345         | 121        | 65            | 8105         | 525          | 1518        | 636         | 493           | 145        | 279           | 12,233           |                    |
|                  | <b>STD</b>                    | <b>340</b>  | <b>65</b>  | <b>26</b>     | <b>8563</b>  | <b>217</b>   | <b>1331</b> | <b>56</b>   | <b>81</b>     | <b>24</b>  | <b>2</b>      |                  | <b>2663</b>        |

|                    |            |             |            |             |              |             |            |             |            |            |            |        |             |
|--------------------|------------|-------------|------------|-------------|--------------|-------------|------------|-------------|------------|------------|------------|--------|-------------|
| Dritta             | Mean       | 245         | 188        | 243         | 21992        | 613         | 18         | 1156        | 409        | 145        | 255        | 25,264 |             |
|                    | <b>STD</b> | <b>231</b>  | <b>136</b> | <b>75</b>   | <b>15221</b> | <b>219</b>  | <b>15</b>  | <b>605</b>  | <b>228</b> | <b>148</b> | <b>180</b> |        | <b>4751</b> |
| Empeltre           | Mean       | 526         | 325        | 1472        | 490          | 166         | 506        | 103         | 124        | 32         | 62         | 3,804  |             |
|                    | <b>STD</b> | <b>79</b>   | <b>100</b> | <b>74</b>   | <b>26</b>    | <b>25</b>   | <b>0</b>   | <b>24</b>   | <b>1</b>   | <b>16</b>  | <b>14</b>  |        | <b>35</b>   |
| Fishomi            | Mean       | 1199        | 174        | 216         | 867          | 263         | 241        | 532         | 88         | 80         | 156        | 3,817  |             |
|                    | <b>STD</b> | <b>16</b>   | <b>28</b>  | <b>74</b>   | <b>275</b>   | <b>26</b>   | <b>119</b> | <b>332</b>  | <b>13</b>  | <b>21</b>  | <b>104</b> |        | <b>114</b>  |
| Frantoio           | Mean       | 397         | 215        | 1472        | 1018         | 1512        | 2955       | 1535        | 187        | 162        | 233        | 9,687  |             |
|                    | <b>STD</b> | <b>132</b>  | <b>60</b>  | <b>70</b>   | <b>117</b>   | <b>308</b>  | <b>333</b> | <b>387</b>  | <b>51</b>  | <b>40</b>  | <b>1</b>   |        | <b>139</b>  |
| Galega Vulgar      | Mean       | 138         | 91         | 2755        | 501          | 113         | 620        | 691         | 131        | 11         | 58         | 5,109  |             |
|                    | <b>STD</b> | <b>22</b>   | <b>1</b>   | <b>212</b>  | <b>23</b>    | <b>16</b>   | <b>81</b>  | <b>38</b>   | <b>11</b>  | <b>2</b>   | <b>8</b>   |        | <b>65</b>   |
| Gordal Sevillana   | Mean       | 587         | 172        | 181         | 3851         | 322         | 15         | 592         | 236        | 52         | 119        | 6,126  |             |
|                    | <b>STD</b> | <b>636</b>  | <b>76</b>  | <b>92</b>   | <b>67</b>    | <b>61</b>   | <b>4</b>   | <b>452</b>  | <b>149</b> | <b>57</b>  | <b>74</b>  |        | <b>207</b>  |
| Hojiblanca         | Mean       | 979         | 150        | 71          | 5088         | 263         | 346        | 1370        | 887        | 159        | 259        | 9,572  |             |
|                    | <b>STD</b> | <b>1012</b> | <b>54</b>  | <b>23</b>   | <b>2677</b>  | <b>46</b>   | <b>233</b> | <b>20</b>   | <b>219</b> | <b>11</b>  | <b>17</b>  |        | <b>846</b>  |
| Istarska belica    | Mean       | 312         | 166        | 3096        | 14198        | 363         | 659        | 1487        | 640        | 26         | 320        | 21,268 |             |
|                    | <b>STD</b> | <b>196</b>  | <b>12</b>  | <b>2486</b> | <b>10734</b> | <b>113</b>  | <b>4</b>   | <b>136</b>  | <b>332</b> | <b>3</b>   | <b>158</b> |        | <b>3358</b> |
| Izmir Sofralik     | Mean       | 1343        | 137        | 77          | 13431        | 930         | 171        | 1134        | 768        | 49         | 242        | 18,282 |             |
|                    | <b>STD</b> | <b>104</b>  | <b>22</b>  | <b>9</b>    | <b>74</b>    | <b>28</b>   | <b>11</b>  | <b>22</b>   | <b>2</b>   | <b>4</b>   | <b>38</b>  |        | <b>33</b>   |
| Kalamon            | Mean       | 1613        | 1114       | 633         | 10204        | 1033        | 592        | 2130        | 651        | 61         | 291        | 18,322 |             |
|                    | <b>STD</b> | <b>1720</b> | <b>647</b> | <b>693</b>  | <b>828</b>   | <b>1085</b> | <b>739</b> | <b>541</b>  | <b>7</b>   | <b>18</b>  | <b>149</b> |        | <b>522</b>  |
| Konservolia        | Mean       | 390         | 195        | 93          | 1396         | 235         | 10         | 849         | 285        | 103        | 128        | 3,684  |             |
|                    | <b>STD</b> | <b>28</b>   | <b>26</b>  | <b>30</b>   | <b>42</b>    | <b>38</b>   | <b>10</b>  | <b>32</b>   | <b>13</b>  | <b>10</b>  | <b>36</b>  |        | <b>12</b>   |
| Koroneiki          | Mean       | 200         | 124        | 458         | 32777        | 828         | 82         | 5095        | 414        | 49         | 275        | 40,302 |             |
|                    | <b>STD</b> | <b>62</b>   | <b>1</b>   | <b>137</b>  | <b>5626</b>  | <b>76</b>   | <b>45</b>  | <b>1292</b> | <b>43</b>  | <b>14</b>  | <b>106</b> |        | <b>1760</b> |
| Lastovka           | Mean       | 700         | 132        | 310         | 10628        | 571         | 259        | 1366        | 371        | 53         | 241        | 14,631 |             |
|                    | <b>STD</b> | <b>156</b>  | <b>141</b> | <b>290</b>  | <b>2980</b>  | <b>590</b>  | <b>139</b> | <b>788</b>  | <b>42</b>  | <b>10</b>  | <b>265</b> |        | <b>891</b>  |
| Leccino            | Mean       | 425         | 145        | 1282        | 1005         | 447         | 296        | 1604        | 336        | 104        | 193        | 5,837  |             |
|                    | <b>STD</b> | <b>448</b>  | <b>81</b>  | <b>1104</b> | <b>487</b>   | <b>587</b>  | <b>354</b> | <b>532</b>  | <b>180</b> | <b>58</b>  | <b>141</b> |        | <b>315</b>  |
| Leccio del Corno   | Mean       | 293         | 267        | 123         | 2710         | 216         | 49         | 763         | 343        | 110        | 248        | 5,121  |             |
|                    | <b>STD</b> | <b>40</b>   | <b>18</b>  | <b>1</b>    | <b>232</b>   | <b>6</b>    | <b>5</b>   | <b>25</b>   | <b>25</b>  | <b>3</b>   | <b>11</b>  |        | <b>70</b>   |
| Lechin de Sevilla  | Mean       | 652         | 214        | 375         | 4130         | 1023        | 913        | 569         | 191        | 66         | 158        | 8,289  |             |
|                    | <b>STD</b> | <b>119</b>  | <b>31</b>  | <b>53</b>   | <b>768</b>   | <b>245</b>  | <b>127</b> | <b>110</b>  | <b>52</b>  | <b>19</b>  | <b>17</b>  |        | <b>227</b>  |
| Majorca            | Mean       | 78          | 120        | 155         | 13208        | 213         | 505        | 2387        | 533        | 64         | 122        | 17,385 |             |
|                    | <b>STD</b> | <b>2</b>    | <b>8</b>   | <b>10</b>   | <b>103</b>   | <b>10</b>   | <b>17</b>  | <b>275</b>  | <b>80</b>  | <b>1</b>   | <b>31</b>  |        | <b>85</b>   |
| Manzanilla de Jaen | Mean       | 316         | 236        | 195         | 4101         | 798         | 51         | 800         | 421        | 101        | 213        | 7,231  |             |

|                       |            |             |            |             |              |            |             |             |             |            |            |        |             |
|-----------------------|------------|-------------|------------|-------------|--------------|------------|-------------|-------------|-------------|------------|------------|--------|-------------|
|                       | <b>STD</b> | <b>19</b>   | <b>13</b>  | <b>8</b>    | <b>108</b>   | <b>74</b>  | <b>2</b>    | <b>16</b>   | <b>12</b>   | <b>1</b>   | <b>34</b>  |        | <b>35</b>   |
| Manzanilla de Sevilla | Mean       | 378         | 163        | 103         | 6957         | 422        | 281         | 775         | 295         | 93         | 166        | 9,634  |             |
|                       | <b>STD</b> | <b>322</b>  | <b>32</b>  | <b>38</b>   | <b>490</b>   | <b>273</b> | <b>273</b>  | <b>445</b>  | <b>3</b>    | <b>7</b>   | <b>85</b>  |        | <b>186</b>  |
| Maurino               | Mean       | 693         | 268        | 308         | 581          | 421        | 1108        | 588         | 67          | 68         | 117        | 4,220  |             |
|                       | <b>STD</b> | <b>288</b>  | <b>101</b> | <b>53</b>   | <b>42</b>    | <b>89</b>  | <b>260</b>  | <b>106</b>  | <b>6</b>    | <b>27</b>  | <b>34</b>  |        | <b>97</b>   |
| Memecik               | Mean       | 280         | 273        | 172         | 5693         | 622        | 61          | 1895        | 538         | 90         | 217        | 9,841  |             |
|                       | <b>STD</b> | <b>74</b>   | <b>59</b>  | <b>49</b>   | <b>568</b>   | <b>53</b>  | <b>6</b>    | <b>373</b>  | <b>73</b>   | <b>11</b>  | <b>1</b>   |        | <b>189</b>  |
| Meski                 | Mean       | 98          | 127        | 536         | 29570        | 931        | 1533        | 1041        | 237         | 68         | 118        | 34,260 |             |
|                       | <b>STD</b> | <b>31</b>   | <b>54</b>  | <b>113</b>  | <b>11761</b> | <b>51</b>  | <b>422</b>  | <b>261</b>  | <b>5</b>    | <b>25</b>  | <b>20</b>  |        | <b>3687</b> |
| Moraiolo              | Mean       | 872         | 233        | 729         | 5770         | 691        | 1642        | 2275        | 619         | 445        | 335        | 13,613 |             |
|                       | <b>STD</b> | <b>955</b>  | <b>10</b>  | <b>188</b>  | <b>5826</b>  | <b>374</b> | <b>629</b>  | <b>619</b>  | <b>72</b>   | <b>128</b> | <b>27</b>  |        | <b>1765</b> |
| Moresca               | Mean       | 133         | 97         | 53          | 5538         | 322        | 210         | 721         | 384         | 40         | 123        | 7,621  |             |
|                       | <b>STD</b> | <b>0</b>    | <b>38</b>  | <b>5</b>    | <b>618</b>   | <b>62</b>  | <b>32</b>   | <b>69</b>   | <b>65</b>   | <b>21</b>  | <b>24</b>  |        | <b>186</b>  |
| Morisca               | Mean       | 301         | 109        | 73          | 5837         | 239        | 116         | 1335        | 610         | 25         | 225        | 8,871  |             |
|                       | <b>STD</b> | <b>9</b>    | <b>7</b>   | <b>2</b>    | <b>6833</b>  | <b>23</b>  | <b>11</b>   | <b>15</b>   | <b>30</b>   | <b>1</b>   | <b>7</b>   |        | <b>2157</b> |
| Morrut                | Mean       | 329         | 433        | 98          | 11631        | 382        | 1420        | 196         | 100         | 67         | 81         | 14,737 |             |
|                       | <b>STD</b> | <b>11</b>   | <b>53</b>  | <b>18</b>   | <b>704</b>   | <b>45</b>  | <b>633</b>  | <b>48</b>   | <b>24</b>   | <b>23</b>  | <b>24</b>  |        | <b>270</b>  |
| Nocellara del Belice  | Mean       | 288         | 197        | 316         | 8558         | 429        | 362         | 659         | 255         | 64         | 248        | 11,377 |             |
|                       | <b>STD</b> | <b>54</b>   | <b>36</b>  | <b>109</b>  | <b>386</b>   | <b>30</b>  | <b>20</b>   | <b>161</b>  | <b>31</b>   | <b>1</b>   | <b>63</b>  |        | <b>115</b>  |
| Nociara               | Mean       | 620         | 351        | 2605        | 867          | 2190       | 76          | 149         | 127         | 46         | 147        | 7,177  |             |
|                       | <b>STD</b> | <b>257</b>  | <b>6</b>   | <b>159</b>  | <b>75</b>    | <b>334</b> | <b>16</b>   | <b>17</b>   | <b>12</b>   | <b>11</b>  | <b>16</b>  |        | <b>119</b>  |
| Oblica                | Mean       | 279         | 267        | 4708        | 4965         | 563        | 955         | 593         | 149         | 28         | 77         | 12,585 |             |
|                       | <b>STD</b> | <b>28</b>   | <b>15</b>  | <b>5621</b> | <b>3125</b>  | <b>407</b> | <b>1225</b> | <b>2</b>    | <b>12</b>   | <b>14</b>  | <b>36</b>  |        | <b>1887</b> |
| Passalunara           | Mean       | 385         | 148        | 1554        | 20535        | 366        | 281         | 2643        | 1077        | 178        | 285        | 27,451 |             |
|                       | <b>STD</b> | <b>443</b>  | <b>88</b>  | <b>1322</b> | <b>6739</b>  | <b>209</b> | <b>311</b>  | <b>110</b>  | <b>186</b>  | <b>217</b> | <b>182</b> |        | <b>2055</b> |
| Pendolino             | Mean       | 282         | 222        | 4094        | 9932         | 1037       | 615         | 1415        | 345         | 54         | 186        | 18,182 |             |
|                       | <b>STD</b> | <b>224</b>  | <b>25</b>  | <b>3101</b> | <b>7604</b>  | <b>84</b>  | <b>569</b>  | <b>412</b>  | <b>67</b>   | <b>2</b>   | <b>130</b> |        | <b>2429</b> |
| Peranzana             | Mean       | 946         | 174        | 193         | 8944         | 449        | 4523        | 1894        | 448         | 162        | 213        | 17,946 |             |
|                       | <b>STD</b> | <b>182</b>  | <b>56</b>  | <b>176</b>  | <b>10994</b> | <b>325</b> | <b>307</b>  | <b>175</b>  | <b>132</b>  | <b>170</b> | <b>13</b>  |        | <b>3424</b> |
| Picholine Languedoc   | Mean       | 582         | 355        | 221         | 8527         | 424        | 759         | 1146        | 527         | 52         | 228        | 12,822 |             |
|                       | <b>STD</b> | <b>144</b>  | <b>144</b> | <b>177</b>  | <b>1411</b>  | <b>188</b> | <b>759</b>  | <b>343</b>  | <b>272</b>  | <b>27</b>  | <b>194</b> |        | <b>417</b>  |
| Picholine Marocaine   | Mean       | 1905        | 375        | 134         | 23529        | 652        | 677         | 1985        | 1527        | 114        | 209        | 31,107 |             |
|                       | <b>STD</b> | <b>2325</b> | <b>253</b> | <b>101</b>  | <b>9219</b>  | <b>157</b> | <b>521</b>  | <b>1435</b> | <b>1117</b> | <b>135</b> | <b>205</b> |        | <b>2793</b> |
| Picual                | Mean       | 325         | 180        | 122         | 14309        | 690        | 177         | 1843        | 374         | 89         | 200        | 18,308 |             |
|                       | <b>STD</b> | <b>292</b>  | <b>71</b>  | <b>112</b>  | <b>1861</b>  | <b>461</b> | <b>68</b>   | <b>728</b>  | <b>73</b>   | <b>5</b>   | <b>100</b> |        | <b>568</b>  |

|                  |            |            |            |             |              |            |            |             |            |           |            |        |             |
|------------------|------------|------------|------------|-------------|--------------|------------|------------|-------------|------------|-----------|------------|--------|-------------|
| Picudo           | Mean       | 764        | 263        | 102         | 21817        | 599        | 132        | 2570        | 734        | 174       | 399        | 27,554 |             |
|                  | <b>STD</b> | <b>656</b> | <b>141</b> | <b>6</b>    | <b>12881</b> | <b>583</b> | <b>118</b> | <b>2245</b> | <b>788</b> | <b>36</b> | <b>374</b> |        | <b>3954</b> |
| Pizz'e Carroga   | Mean       | 485        | 179        | 6389        | 13717        | 626        | 70         | 369         | 149        | 53        | 227        | 22,264 |             |
|                  | <b>STD</b> | <b>207</b> | <b>93</b>  | <b>8412</b> | <b>3254</b>  | <b>284</b> | <b>26</b>  | <b>79</b>   | <b>57</b>  | <b>44</b> | <b>88</b>  |        | <b>2703</b> |
| Rowghani         | Mean       | 407        | 201        | 150         | 3406         | 3351       | 829        | 2226        | 509        | 275       | 470        | 11,824 |             |
|                  | <b>STD</b> | <b>18</b>  | <b>1</b>   | <b>7</b>    | <b>215</b>   | <b>121</b> | <b>64</b>  | <b>96</b>   | <b>11</b>  | <b>35</b> | <b>29</b>  |        | <b>68</b>   |
| Salonenque       | Mean       | 300        | 239        | 200         | 8943         | 2044       | 24         | 2037        | 377        | 66        | 62         | 14,291 |             |
|                  | <b>STD</b> | <b>66</b>  | <b>53</b>  | <b>93</b>   | <b>535</b>   | <b>85</b>  | <b>9</b>   | <b>168</b>  | <b>78</b>  | <b>20</b> | <b>5</b>   |        | <b>157</b>  |
| Tanche           | Mean       | 179        | 238        | 180         | 3885         | 275        | 86         | 537         | 357        | 43        | 147        | 5,927  |             |
|                  | <b>STD</b> | <b>67</b>  | <b>71</b>  | <b>26</b>   | <b>478</b>   | <b>8</b>   | <b>0</b>   | <b>145</b>  | <b>9</b>   | <b>27</b> | <b>47</b>  |        | <b>144</b>  |
| Tonda iblea      | Mean       | 238        | 132        | 106         | 3126         | 230        | 70         | 801         | 521        | 87        | 226        | 5,538  |             |
|                  | <b>STD</b> | <b>193</b> | <b>74</b>  | <b>50</b>   | <b>594</b>   | <b>81</b>  | <b>46</b>  | <b>510</b>  | <b>344</b> | <b>70</b> | <b>204</b> |        | <b>201</b>  |
| Uovo di Piccione | Mean       | 245        | 191        | 87          | 2856         | 97         | 97         | 571         | 441        | 52        | 123        | 4,758  |             |
|                  | <b>STD</b> | <b>13</b>  | <b>6</b>   | <b>2</b>    | <b>13</b>    | <b>2</b>   | <b>2</b>   | <b>23</b>   | <b>23</b>  | <b>3</b>  | <b>1</b>   |        | <b>9</b>    |
| Vera             | Mean       | 235        | 260        | 113         | 6335         | 300        | 68         | 1248        | 868        | 44        | 233        | 9,702  |             |
|                  | <b>STD</b> | <b>7</b>   | <b>8</b>   | <b>15</b>   | <b>43</b>    | <b>30</b>  | <b>33</b>  | <b>17</b>   | <b>28</b>  | <b>8</b>  | <b>4</b>   |        | <b>13</b>   |
| Verdale          | Mean       | 164        | 216        | 155         | 4331         | 185        | 34         | 1132        | 444        | 62        | 142        | 6,866  |             |
|                  | <b>STD</b> | <b>6</b>   | <b>17</b>  | <b>35</b>   | <b>144</b>   | <b>4</b>   | <b>14</b>  | <b>103</b>  | <b>62</b>  | <b>23</b> | <b>22</b>  |        | <b>46</b>   |
| Zaity            | Mean       | 371        | 178        | 147         | 5406         | 331        | 265        | 299         | 197        | 64        | 155        | 7,414  |             |
|                  | <b>STD</b> | <b>390</b> | <b>103</b> | <b>101</b>  | <b>4802</b>  | <b>156</b> | <b>83</b>  | <b>42</b>   | <b>78</b>  | <b>58</b> | <b>16</b>  |        | <b>1486</b> |
| Zard             | Mean       | 263        | 175        | 298         | 12524        | 919        | 51         | 2567        | 499        | 74        | 506        | 17,876 |             |
|                  | <b>STD</b> | <b>180</b> | <b>71</b>  | <b>133</b>  | <b>12019</b> | <b>849</b> | <b>17</b>  | <b>399</b>  | <b>73</b>  | <b>2</b>  | <b>53</b>  |        | <b>3747</b> |

\* Total phenols represented the sum of all analyzed phenolic compounds for each cultivar.

\*\* Total STD is a standard deviation of all phenols calculated from each STD.

**Table S3.** Descriptive statistics of squalene and sterols (expressed as mg kg<sup>-1</sup> of fresh fruit pulp) in 61 cultivars and two consecutive crop seasons.

| Cultivar         | Descriptive statistics | SQU           | CAMP         | ST STE       | β STE         | β STA        | Total ST* | Total STD**   |
|------------------|------------------------|---------------|--------------|--------------|---------------|--------------|-----------|---------------|
| Arauco           | Mean                   | 1241          | 6.26         | 5.79         | 164.41        | 9.93         | 186.39    |               |
|                  | STD                    | <b>8.85</b>   | <b>0.03</b>  | <b>4.50</b>  | <b>0.98</b>   | <b>0.10</b>  |           | <b>3.80</b>   |
| Arbequina        | Mean                   | 666           | 11.54        | 7.07         | 196.10        | 39.03        | 253.75    |               |
|                  | STD                    | <b>237.49</b> | <b>5.99</b>  | <b>4.26</b>  | <b>26.61</b>  | <b>8.31</b>  |           | <b>101.55</b> |
| Arbosana         | Mean                   | 717           | 17.02        | 9.31         | 236.57        | 36.25        | 299.15    |               |
|                  | STD                    | <b>180.31</b> | <b>4.39</b>  | <b>3.48</b>  | <b>4.52</b>   | <b>15.20</b> |           | <b>77.70</b>  |
| Biancolilla      | Mean                   | 2068          | 5.42         | 7.45         | 205.82        | 12.24        | 230.92    |               |
|                  | STD                    | <b>85.18</b>  | <b>0.59</b>  | <b>0.78</b>  | <b>10.50</b>  | <b>1.08</b>  |           | <b>36.89</b>  |
| Branquita        | Mean                   | 1222          | 22.05        | 19.20        | 406.91        | 42.04        | 490.20    |               |
|                  | STD                    | <b>46.49</b>  | <b>6.74</b>  | <b>2.87</b>  | <b>72.67</b>  | <b>5.01</b>  |           | <b>31.39</b>  |
| Buyuk Topakislak | Mean                   | 1948          | 22.67        | 11.78        | 498.03        | 1.92         | 534.39    |               |
|                  | STD                    | <b>1740</b>   | <b>20.05</b> | <b>11.80</b> | <b>513.96</b> | <b>1.21</b>  |           | <b>749.42</b> |
| Canino           | Mean                   | 858           | 16.42        | 24.27        | 215.31        | 37.44        | 293.43    |               |
|                  | STD                    | <b>409.40</b> | <b>5.58</b>  | <b>23.50</b> | <b>70.13</b>  | <b>22.71</b> |           | <b>171.15</b> |
| Carolea          | Mean                   | 2613          | 13.19        | 5.75         | 441.60        | 63.38        | 523.92    |               |
|                  | STD                    | <b>264.63</b> | <b>4.88</b>  | <b>1.83</b>  | <b>283.22</b> | <b>16.50</b> |           | <b>146.05</b> |
| Chalkidikis      | Mean                   | 1087          | 15.88        | 4.65         | 272.51        | 7.48         | 300.51    |               |
|                  | STD                    | <b>325.61</b> | <b>4.44</b>  | <b>3.04</b>  | <b>40.27</b>  | <b>1.38</b>  |           | <b>141.06</b> |
| Changlot Real    | Mean                   | 1191          | 5.33         | 7.55         | 98.44         | 8.17         | 119.48    |               |
|                  | STD                    | <b>231.93</b> | <b>0.55</b>  | <b>8.34</b>  | <b>37.79</b>  | <b>1.88</b>  |           | <b>99.45</b>  |
| Chemlali         | Mean                   | 1553          | 34.45        | 4.42         | 626.58        | 36.77        | 702.22    |               |
|                  | STD                    | <b>407.15</b> | <b>16.36</b> | <b>4.35</b>  | <b>266.96</b> | <b>2.03</b>  |           | <b>187.22</b> |
| Chetoui          | Mean                   | 1293          | 12.80        | 7.79         | 295.35        | 20.26        | 336.20    |               |
|                  | STD                    | <b>187.10</b> | <b>3.66</b>  | <b>6.54</b>  | <b>177.57</b> | <b>20.25</b> |           | <b>94.58</b>  |
| Cipressino       | Mean                   | 1046          | 21.69        | 24.68        | 224.19        | 23.77        | 294.33    |               |
|                  | STD                    | <b>710.45</b> | <b>7.63</b>  | <b>21.17</b> | <b>44.66</b>  | <b>27.49</b> |           | <b>306.72</b> |
| Coratina         | Mean                   | 1499          | 13.23        | 3.66         | 304.40        | 19.38        | 340.66    |               |
|                  | STD                    | <b>816.19</b> | <b>6.59</b>  | <b>1.64</b>  | <b>68.94</b>  | <b>3.00</b>  |           | <b>357.17</b> |
| Domat            | Mean                   | 3052          | 18.27        | 5.99         | 340.66        | 1.57         | 366.49    |               |
|                  | STD                    | <b>336.83</b> | <b>10.11</b> | <b>0.80</b>  | <b>211.20</b> | <b>0.20</b>  |           | <b>154.63</b> |
| Dritta           | Mean                   | 817           | 11.38        | 16.38        | 151.34        | 35.32        | 214.42    |               |
|                  | STD                    | <b>629.02</b> | <b>0.49</b>  | <b>8.77</b>  | <b>8.95</b>   | <b>17.54</b> |           | <b>277.38</b> |
| Empeltre         | Mean                   | 468           | 14.90        | 9.51         | 285.91        | 21.71        | 332.03    |               |
|                  | STD                    | <b>328.50</b> | <b>8.88</b>  | <b>1.62</b>  | <b>117.42</b> | <b>25.45</b> |           | <b>137.83</b> |
| Fishomi          | Mean                   | 2181          | 14.95        | 2.69         | 183.39        | 9.61         | 210.64    |               |
|                  | STD                    | <b>1157</b>   | <b>0.65</b>  | <b>1.14</b>  | <b>25.15</b>  | <b>8.32</b>  |           | <b>513.74</b> |
| Frantoio         | Mean                   | 1119          | 19.18        | 5.88         | 353.85        | 25.72        | 404.63    |               |
|                  | STD                    | <b>519.60</b> | <b>6.42</b>  | <b>3.68</b>  | <b>32.09</b>  | <b>27.83</b> |           | <b>224.90</b> |
| Galega Vulgar    | Mean                   | 274           | 2.59         | 4.50         | 116.81        | 11.45        | 135.35    |               |
|                  | STD                    | <b>30.52</b>  | <b>0.12</b>  | <b>0.71</b>  | <b>1.69</b>   | <b>0.69</b>  |           | <b>13.30</b>  |
| Gordal Sevillana | Mean                   | 1843          | 9.49         | 3.82         | 278.30        | 2.26         | 293.88    |               |
|                  | STD                    | <b>50.04</b>  | <b>0.12</b>  | <b>4.26</b>  | <b>102.57</b> | <b>0.93</b>  |           | <b>44.88</b>  |
| Hojiblanca       | Mean                   | 2060          | 14.04        | 2.28         | 389.48        | 2.17         | 407.97    |               |
|                  | STD                    | <b>2097</b>   | <b>12.31</b> | <b>0.54</b>  | <b>358.77</b> | <b>0.24</b>  |           | <b>909.20</b> |
| Istarska belica  | Mean                   | 2497          | 8.57         | 8.91         | 184.42        | 32.28        | 234.17    |               |
|                  | STD                    | <b>232.71</b> | <b>3.54</b>  | <b>5.51</b>  | <b>34.45</b>  | <b>7.41</b>  |           | <b>99.18</b>  |
| Izmir Sofralik   | Mean                   | 818           | 1.94         | 1.06         | 162.73        | 1.64         | 167.38    |               |
|                  | STD                    | <b>12.64</b>  | <b>0.22</b>  | <b>0.08</b>  | <b>21.42</b>  | <b>0.91</b>  |           | <b>9.63</b>   |
| Kalamon          | Mean                   | 1700          | 10.06        | 13.72        | 385.85        | 49.70        | 459.32    |               |



|                       |            |               |              |              |               |              |        |                |
|-----------------------|------------|---------------|--------------|--------------|---------------|--------------|--------|----------------|
|                       | <b>STD</b> | <b>1213</b>   | <b>7.77</b>  | <b>15.86</b> | <b>167.13</b> | <b>43.41</b> |        | <b>520.11</b>  |
| Konservolia           | Mean       | 2296          | 10.86        | 21.29        | 251.60        | 5.45         | 289.19 |                |
|                       | <b>STD</b> | <b>764.85</b> | <b>2.40</b>  | <b>1.22</b>  | <b>120.34</b> | <b>0.45</b>  |        | <b>332.16</b>  |
| Koroneiki             | Mean       | 928           | 12.39        | 11.32        | 186.22        | 23.87        | 233.79 |                |
|                       | <b>STD</b> | <b>103.39</b> | <b>0.21</b>  | <b>0.37</b>  | <b>9.56</b>   | <b>31.40</b> |        | <b>43.49</b>   |
| Lastovka              | Mean       | 1525          | 8.58         | 26.27        | 217.60        | 11.41        | 263.86 |                |
|                       | <b>STD</b> | <b>356.89</b> | <b>7.51</b>  | <b>15.82</b> | <b>86.17</b>  | <b>2.94</b>  |        | <b>150.88</b>  |
| Leccino               | Mean       | 1071          | 10.35        | 9.60         | 199.30        | 18.88        | 238.13 |                |
|                       | <b>STD</b> | <b>952.34</b> | <b>6.25</b>  | <b>7.44</b>  | <b>76.59</b>  | <b>24.59</b> |        | <b>414.04</b>  |
| Leccio del Corno      | Mean       | 478           | 10.91        | 6.06         | 244.90        | 2.50         | 264.37 |                |
|                       | <b>STD</b> | <b>34.93</b>  | <b>0.59</b>  | <b>4.21</b>  | <b>18.24</b>  | <b>0.71</b>  |        | <b>14.85</b>   |
| Lechin de Sevilla     | Mean       | 1168          | 16.36        | 9.58         | 362.77        | 12.78        | 401.49 |                |
|                       | <b>STD</b> | <b>460.85</b> | <b>3.12</b>  | <b>1.31</b>  | <b>129.20</b> | <b>13.96</b> |        | <b>197.01</b>  |
| Majorca               | Mean       | 846           | 8.42         | 19.51        | 182.70        | 2.50         | 213.13 |                |
|                       | <b>STD</b> | <b>19.76</b>  | <b>0.38</b>  | <b>4.86</b>  | <b>6.02</b>   | <b>0.71</b>  |        | <b>7.90</b>    |
| Manzanilla de Jaen    | Mean       | 810           | 8.59         | 5.70         | 155.88        | 22.64        | 192.81 |                |
|                       | <b>STD</b> | <b>78.63</b>  | <b>0.59</b>  | <b>0.43</b>  | <b>8.65</b>   | <b>0.50</b>  |        | <b>34.21</b>   |
| Manzanilla de Sevilla | Mean       | 2116          | 9.01         | 13.77        | 297.67        | 9.91         | 330.36 |                |
|                       | <b>STD</b> | <b>1240</b>   | <b>2.65</b>  | <b>11.84</b> | <b>138.59</b> | <b>7.01</b>  |        | <b>539.51</b>  |
| Maurino               | Mean       | 1039          | 10.12        | 3.31         | 223.73        | 27.42        | 264.59 |                |
|                       | <b>STD</b> | <b>581.31</b> | <b>2.15</b>  | <b>1.70</b>  | <b>40.69</b>  | <b>23.54</b> |        | <b>252.88</b>  |
| Memecik               | Mean       | 2131          | 12.57        | 7.30         | 317.68        | 1.99         | 339.55 |                |
|                       | <b>STD</b> | <b>1158</b>   | <b>3.32</b>  | <b>2.45</b>  | <b>170.04</b> | <b>0.70</b>  |        | <b>503.38</b>  |
| Meski                 | Mean       | 1145          | 11.62        | 2.40         | 239.79        | 48.66        | 302.48 |                |
|                       | <b>STD</b> | <b>825.14</b> | <b>6.82</b>  | <b>0.14</b>  | <b>52.87</b>  | <b>35.78</b> |        | <b>358.97</b>  |
| Moraiolo              | Mean       | 2234          | 11.50        | 6.34         | 312.09        | 10.36        | 340.29 |                |
|                       | <b>STD</b> | <b>693.92</b> | <b>3.45</b>  | <b>6.14</b>  | <b>68.52</b>  | <b>6.45</b>  |        | <b>302.12</b>  |
| Moresca               | Mean       | 2333          | 13.89        | 21.09        | 221.77        | 29.44        | 286.19 |                |
|                       | <b>STD</b> | <b>830.90</b> | <b>0.43</b>  | <b>4.27</b>  | <b>3.49</b>   | <b>21.23</b> |        | <b>368.39</b>  |
| Morisca               | Mean       | 3300          | 22.14        | 7.49         | 829.60        | 119.89       | 979.11 |                |
|                       | <b>STD</b> | <b>126.14</b> | <b>1.61</b>  | <b>0.73</b>  | <b>7.64</b>   | <b>7.22</b>  |        | <b>54.58</b>   |
| Morrut                | Mean       | 2769          | 15.30        | 15.20        | 306.93        | 15.24        | 352.67 |                |
|                       | <b>STD</b> | <b>514.09</b> | <b>2.59</b>  | <b>6.29</b>  | <b>209.79</b> | <b>13.59</b> |        | <b>221.99</b>  |
| Nocellara del Belice  | Mean       | 2251          | 12.50        | 10.00        | 237.50        | 20.50        | 280.50 |                |
|                       | <b>STD</b> | <b>419.31</b> | <b>0.71</b>  | <b>1.41</b>  | <b>23.33</b>  | <b>0.71</b>  |        | <b>184.85</b>  |
| Nociara               | Mean       | 1566          | 14.22        | 5.49         | 297.43        | 27.59        | 344.73 |                |
|                       | <b>STD</b> | <b>575.65</b> | <b>1.23</b>  | <b>3.00</b>  | <b>101.21</b> | <b>7.20</b>  |        | <b>248.46</b>  |
| Oblica                | Mean       | 2325          | 20.57        | 29.55        | 388.94        | 10.70        | 449.76 |                |
|                       | <b>STD</b> | <b>1511</b>   | <b>0.64</b>  | <b>27.43</b> | <b>184.35</b> | <b>12.84</b> |        | <b>654.85</b>  |
| Passalunara           | Mean       | 3187          | 15.90        | 24.41        | 209.05        | 5.46         | 254.82 |                |
|                       | <b>STD</b> | <b>3744</b>   | <b>3.97</b>  | <b>25.59</b> | <b>111.80</b> | <b>4.90</b>  |        | <b>1658.44</b> |
| Pendolino             | Mean       | 641           | 6.35         | 3.68         | 170.06        | 11.17        | 191.27 |                |
|                       | <b>STD</b> | <b>489.52</b> | <b>3.25</b>  | <b>2.38</b>  | <b>34.50</b>  | <b>0.24</b>  |        | <b>214.87</b>  |
| Peranzana             | Mean       | 2639          | 12.71        | 3.81         | 247.09        | 15.47        | 279.08 |                |
|                       | <b>STD</b> | <b>133.70</b> | <b>3.19</b>  | <b>0.44</b>  | <b>81.10</b>  | <b>7.42</b>  |        | <b>59.83</b>   |
| Picholine Languedoc   | Mean       | 1234          | 19.62        | 4.40         | 342.76        | 4.07         | 370.85 |                |
|                       | <b>STD</b> | <b>810.35</b> | <b>12.16</b> | <b>0.24</b>  | <b>155.28</b> | <b>0.85</b>  |        | <b>349.74</b>  |
| Picholine Marocaine   | Mean       | 1506          | 17.90        | 2.23         | 421.22        | 6.98         | 448.32 |                |
|                       | <b>STD</b> | <b>218.02</b> | <b>0.55</b>  | <b>0.38</b>  | <b>85.10</b>  | <b>6.40</b>  |        | <b>94.26</b>   |
| Picual                | Mean       | 1519          | 15.65        | 3.09         | 336.62        | 5.50         | 360.86 |                |
|                       | <b>STD</b> | <b>1351</b>   | <b>8.56</b>  | <b>0.44</b>  | <b>239.71</b> | <b>3.51</b>  |        | <b>584.80</b>  |
| Picudo                | Mean       | 1182          | 12.01        | 5.97         | 251.51        | 4.72         | 274.21 |                |
|                       | <b>STD</b> | <b>280.05</b> | <b>0.06</b>  | <b>4.20</b>  | <b>41.08</b>  | <b>4.55</b>  |        | <b>120.81</b>  |
| Pizz'e Carroga        | Mean       | 2184          | 12.72        | 4.94         | 232.36        | 48.33        | 298.34 |                |

|                  |            |               |              |              |               |              |        |               |
|------------------|------------|---------------|--------------|--------------|---------------|--------------|--------|---------------|
|                  | <b>STD</b> | <b>522.45</b> | <b>2.57</b>  | <b>1.64</b>  | <b>50.61</b>  | <b>21.31</b> |        | <b>226.01</b> |
| Rowghani         | Mean       | 1033          | 12.40        | 8.96         | 142.49        | 12.64        | 176.49 |               |
|                  | <b>STD</b> | <b>67.05</b>  | <b>3.67</b>  | <b>1.35</b>  | <b>24.76</b>  | <b>0.91</b>  |        | <b>28.35</b>  |
| Salonenque       | Mean       | 1314          | 14.11        | 14.51        | 342.87        | 57.60        | 429.09 |               |
|                  | <b>STD</b> | <b>592.93</b> | <b>4.14</b>  | <b>9.96</b>  | <b>15.10</b>  | <b>23.02</b> |        | <b>259.42</b> |
| Tanche           | Mean       | 1355          | 15.99        | 14.52        | 303.79        | 47.16        | 381.45 |               |
|                  | <b>STD</b> | <b>756.99</b> | <b>11.87</b> | <b>4.87</b>  | <b>259.19</b> | <b>39.84</b> |        | <b>320.86</b> |
| Tonda iblea      | Mean       | 1846          | 15.00        | 8.18         | 264.40        | 11.05        | 298.63 |               |
|                  | <b>STD</b> | <b>287.57</b> | <b>2.75</b>  | <b>2.13</b>  | <b>5.74</b>   | <b>11.67</b> |        | <b>126.17</b> |
| Uovo di Piccione | Mean       | 2659          | 61.86        | 12.36        | 843.28        | 1.37         | 918.87 |               |
|                  | <b>STD</b> | <b>153.21</b> | <b>13.26</b> | <b>3.31</b>  | <b>79.71</b>  | <b>0.89</b>  |        | <b>66.10</b>  |
| Vera             | Mean       | 1068          | 12.03        | 22.77        | 208.77        | 4.30         | 247.87 |               |
|                  | <b>STD</b> | <b>107.65</b> | <b>0.46</b>  | <b>2.65</b>  | <b>22.24</b>  | <b>3.02</b>  |        | <b>45.82</b>  |
| Verdale          | Mean       | 4351          | 25.54        | 6.18         | 456.59        | 11.04        | 499.36 |               |
|                  | <b>STD</b> | <b>1.34</b>   | <b>6.31</b>  | <b>1.15</b>  | <b>7.65</b>   | <b>1.48</b>  |        | <b>3.14</b>   |
| Zaity            | Mean       | 1498          | 12.40        | 22.82        | 144.13        | 11.00        | 190.36 |               |
|                  | <b>STD</b> | <b>573.88</b> | <b>1.26</b>  | <b>25.81</b> | <b>28.00</b>  | <b>0.00</b>  |        | <b>250.84</b> |
| Zard             | Mean       | 1222          | 8.62         | 12.46        | 185.23        | 20.59        | 226.90 |               |
|                  | <b>STD</b> | <b>104.76</b> | <b>0.24</b>  | <b>13.40</b> | <b>80.81</b>  | <b>1.33</b>  |        | <b>49.10</b>  |

\* Total sterols for each cultivar.

\*\* Total STD is a standard deviation of squalene and sterols from each STD.

**Table S4.** Descriptive statistics of tocopherols (expressed as mg kg<sup>-1</sup> of fresh fruit pulp) and oil content in fruit fresh weight (%) in 61 cultivars and two consecutive crop seasons.

| Cultivar         | Descriptive statistics | $\alpha$ _TOC | $\gamma$ _TOC | $\beta$ _TOC | OCFFW       | Total TOC* | Total TOC STD** |
|------------------|------------------------|---------------|---------------|--------------|-------------|------------|-----------------|
| Arauco           | Mean                   | 230.42        | 23.31         | 3.90         | 21.52       | 257.64     |                 |
|                  | <b>STD</b>             | <b>30.89</b>  | <b>1.86</b>   | <b>3.96</b>  | <b>0.69</b> |            | <b>16.19</b>    |
| Arbequina        | Mean                   | 308.66        | 22.38         | 5.83         | 19.30       | 336.87     |                 |
|                  | <b>STD</b>             | <b>179.93</b> | <b>6.46</b>   | <b>8.24</b>  | <b>3.92</b> |            | <b>99.64</b>    |
| Arbosana         | Mean                   | 474.05        | 23.39         | 0.63         | 19.73       | 498.07     |                 |
|                  | <b>STD</b>             | <b>118.18</b> | <b>3.03</b>   | <b>0.88</b>  | <b>0.32</b> |            | <b>67.11</b>    |
| Biancolilla      | Mean                   | 161.19        | 28.92         | 7.25         | 25.01       | 197.36     |                 |
|                  | <b>STD</b>             | <b>17.30</b>  | <b>9.19</b>   | <b>3.89</b>  | <b>0.02</b> |            | <b>6.76</b>     |
| Branquita        | Mean                   | 365.52        | 24.04         | 14.10        | 17.37       | 403.66     |                 |
|                  | <b>STD</b>             | <b>114.15</b> | <b>1.94</b>   | <b>2.97</b>  | <b>3.55</b> |            | <b>64.49</b>    |
| Buyuk Topakislak | Mean                   | 310.86        | 30.63         | 10.58        | 16.47       | 352.07     |                 |
|                  | <b>STD</b>             | <b>205.20</b> | <b>24.41</b>  | <b>0.81</b>  | <b>7.73</b> |            | <b>111.81</b>   |
| Canino           | Mean                   | 306.91        | 25.11         | 11.15        | 19.46       | 343.16     |                 |
|                  | <b>STD</b>             | <b>42.63</b>  | <b>4.11</b>   | <b>6.08</b>  | <b>1.77</b> |            | <b>21.69</b>    |
| Carolea          | Mean                   | 241.43        | 21.42         | 12.88        | 19.54       | 275.73     |                 |
|                  | <b>STD</b>             | <b>43.39</b>  | <b>2.78</b>   | <b>9.73</b>  | <b>0.12</b> |            | <b>21.72</b>    |
| Chalkidikis      | Mean                   | 151.84        | 14.62         | 4.29         | 23.80       | 170.75     |                 |
|                  | <b>STD</b>             | <b>54.40</b>  | <b>10.05</b>  | <b>1.82</b>  | <b>6.36</b> |            | <b>28.28</b>    |
| Changlot Real    | Mean                   | 175.30        | 16.43         | 9.03         | 24.86       | 200.76     |                 |
|                  | <b>STD</b>             | <b>87.85</b>  | <b>10.28</b>  | <b>9.37</b>  | <b>6.94</b> |            | <b>45.05</b>    |
| Chemlali         | Mean                   | 520.88        | 34.89         | 23.37        | 18.16       | 579.14     |                 |
|                  | <b>STD</b>             | <b>254.15</b> | <b>9.88</b>   | <b>0.17</b>  | <b>4.61</b> |            | <b>143.92</b>   |
| Chetoui          | Mean                   | 343.38        | 57.14         | 23.26        | 20.38       | 423.77     |                 |
|                  | <b>STD</b>             | <b>116.84</b> | <b>12.54</b>  | <b>0.20</b>  | <b>0.33</b> |            | <b>64.08</b>    |
| Cipressino       | Mean                   | 455.86        | 56.44         | 21.12        | 15.26       | 533.42     |                 |
|                  | <b>STD</b>             | <b>236.35</b> | <b>45.53</b>  | <b>7.85</b>  | <b>3.32</b> |            | <b>122.51</b>   |
| Coratina         | Mean                   | 276.52        | 25.52         | 6.00         | 17.05       | 308.04     |                 |
|                  | <b>STD</b>             | <b>143.97</b> | <b>20.73</b>  | <b>6.16</b>  | <b>2.69</b> |            | <b>75.71</b>    |
| Domat            | Mean                   | 242.35        | 13.09         | 9.10         | 20.05       | 264.53     |                 |
|                  | <b>STD</b>             | <b>166.80</b> | <b>6.98</b>   | <b>1.27</b>  | <b>1.53</b> |            | <b>93.96</b>    |
| Dritta           | Mean                   | 229.89        | 29.51         | 18.82        | 17.55       | 278.22     |                 |
|                  | <b>STD</b>             | <b>7.44</b>   | <b>7.08</b>   | <b>2.35</b>  | <b>0.18</b> |            | <b>2.84</b>     |
| Empeltre         | Mean                   | 238.50        | 27.51         | 2.85         | 13.21       | 268.87     |                 |
|                  | <b>STD</b>             | <b>55.57</b>  | <b>20.24</b>  | <b>0.92</b>  | <b>1.79</b> |            | <b>27.72</b>    |
| Fishomi          | Mean                   | 227.58        | 29.03         | 20.19        | 17.69       | 276.79     |                 |
|                  | <b>STD</b>             | <b>83.08</b>  | <b>29.44</b>  | <b>22.76</b> | <b>0.99</b> |            | <b>33.07</b>    |
| Frantoio         | Mean                   | 221.42        | 21.94         | 3.40         | 18.94       | 246.76     |                 |
|                  | <b>STD</b>             | <b>97.61</b>  | <b>0.31</b>   | <b>2.26</b>  | <b>0.63</b> |            | <b>55.62</b>    |
| Galega Vulgar    | Mean                   | 122.46        | 8.08          | 4.11         | 12.09       | 134.65     |                 |
|                  | <b>STD</b>             | <b>2.89</b>   | <b>0.28</b>   | <b>0.13</b>  | <b>1.34</b> |            | <b>1.55</b>     |
| Gordal Sevillana | Mean                   | 233.88        | 23.15         | 9.12         | 16.33       | 266.16     |                 |
|                  | <b>STD</b>             | <b>196.87</b> | <b>16.58</b>  | <b>4.35</b>  | <b>5.03</b> |            | <b>107.79</b>   |
| Hojiblanca       | Mean                   | 242.19        | 16.07         | 11.74        | 13.04       | 270.00     |                 |
|                  | <b>STD</b>             | <b>96.93</b>  | <b>5.28</b>   | <b>7.44</b>  | <b>2.81</b> |            | <b>52.30</b>    |
| Istarska belica  | Mean                   | 124.40        | 11.09         | 2.73         | 22.37       | 138.21     |                 |
|                  | <b>STD</b>             | <b>61.04</b>  | <b>8.39</b>   | <b>2.16</b>  | <b>4.95</b> |            | <b>32.34</b>    |
| Izmir Sofralik   | Mean                   | 198.80        | 15.69         | 3.30         | 26.09       | 217.79     |                 |
|                  | <b>STD</b>             | <b>17.36</b>  | <b>7.26</b>   | <b>0.14</b>  | <b>0.50</b> |            | <b>8.65</b>     |
| Kalamon          | Mean                   | 295.91        | 30.44         | 21.25        | 21.86       | 347.60     |                 |
|                  |                        |               |               |              |             |            |                 |

|                        |            |               |              |              |             |        |               |
|------------------------|------------|---------------|--------------|--------------|-------------|--------|---------------|
|                        | <b>STD</b> | <b>143.61</b> | <b>3.78</b>  | <b>0.30</b>  | <b>2.22</b> |        | <b>81.75</b>  |
| Konservolia            | Mean       | 322.10        | 28.26        | 10.38        | 17.90       | 360.74 |               |
|                        | <b>STD</b> | <b>85.39</b>  | <b>7.30</b>  | <b>0.53</b>  | <b>7.08</b> |        | <b>47.16</b>  |
| Koroneiki              | Mean       | 213.13        | 14.90        | 3.03         | 16.84       | 231.05 |               |
|                        | <b>STD</b> | <b>24.28</b>  | <b>4.69</b>  | <b>0.53</b>  | <b>7.54</b> |        | <b>12.69</b>  |
| Lastovka               | Mean       | 319.03        | 20.32        | 13.52        | 17.45       | 352.88 |               |
|                        | <b>STD</b> | <b>125.84</b> | <b>0.62</b>  | <b>3.78</b>  | <b>6.56</b> |        | <b>71.40</b>  |
| Leccino                | Mean       | 325.87        | 29.17        | 19.46        | 14.85       | 374.50 |               |
|                        | <b>STD</b> | <b>94.71</b>  | <b>12.07</b> | <b>14.42</b> | <b>0.69</b> |        | <b>47.05</b>  |
| Leccio del Corno       | Mean       | 192.80        | 22.33        | 12.10        | 14.16       | 227.23 |               |
|                        | <b>STD</b> | <b>27.87</b>  | <b>4.58</b>  | <b>0.42</b>  | <b>0.12</b> |        | <b>14.79</b>  |
| Lechin de Sevilla      | Mean       | 184.88        | 20.09        | 5.48         | 17.42       | 210.45 |               |
|                        | <b>STD</b> | <b>98.79</b>  | <b>6.07</b>  | <b>5.27</b>  | <b>2.78</b> |        | <b>53.76</b>  |
| Majorca                | Mean       | 139.52        | 11.64        | 10.05        | 16.37       | 161.21 |               |
|                        | <b>STD</b> | <b>1.80</b>   | <b>0.57</b>  | <b>0.22</b>  | <b>0.17</b> |        | <b>0.83</b>   |
| Manzanilla de Jaen     | Mean       | 458.58        | 51.21        | 5.80         | 9.10        | 515.59 |               |
|                        | <b>STD</b> | <b>12.14</b>  | <b>1.70</b>  | <b>1.13</b>  | <b>1.28</b> |        | <b>6.20</b>   |
| Manzanilla de Sevilla  | Mean       | 214.92        | 35.67        | 9.24         | 16.13       | 259.83 |               |
|                        | <b>STD</b> | <b>91.36</b>  | <b>29.21</b> | <b>1.79</b>  | <b>6.08</b> |        | <b>45.90</b>  |
| Maurino                | Mean       | 307.06        | 24.40        | 10.83        | 15.02       | 342.28 |               |
|                        | <b>STD</b> | <b>180.35</b> | <b>17.26</b> | <b>0.46</b>  | <b>2.45</b> |        | <b>99.36</b>  |
| Memecik                | Mean       | 326.44        | 28.63        | 19.11        | 18.14       | 374.19 |               |
|                        | <b>STD</b> | <b>149.24</b> | <b>9.18</b>  | <b>1.40</b>  | <b>0.83</b> |        | <b>83.20</b>  |
| Meski                  | Mean       | 260.92        | 44.74        | 15.57        | 13.92       | 321.23 |               |
|                        | <b>STD</b> | <b>180.74</b> | <b>48.16</b> | <b>9.83</b>  | <b>0.94</b> |        | <b>89.68</b>  |
| Moraiolo               | Mean       | 282.44        | 23.98        | 11.95        | 19.88       | 318.36 |               |
|                        | <b>STD</b> | <b>125.27</b> | <b>18.70</b> | <b>10.88</b> | <b>5.29</b> |        | <b>63.90</b>  |
| Moresca                | Mean       | 273.64        | 18.41        | 13.85        | 21.19       | 305.90 |               |
|                        | <b>STD</b> | <b>194.95</b> | <b>10.46</b> | <b>0.21</b>  | <b>5.52</b> |        | <b>109.60</b> |
| Morisca                | Mean       | 280.74        | 23.83        | 14.85        | 23.02       | 319.42 |               |
|                        | <b>STD</b> | <b>9.53</b>   | <b>2.58</b>  | <b>1.20</b>  | <b>0.14</b> |        | <b>4.47</b>   |
| Morrut                 | Mean       | 202.05        | 18.71        | 10.60        | 20.64       | 231.36 |               |
|                        | <b>STD</b> | <b>90.51</b>  | <b>15.35</b> | <b>0.57</b>  | <b>4.55</b> |        | <b>48.23</b>  |
| Nocellara del Belice   | Mean       | 262.00        | 25.70        | 8.50         | 16.32       | 296.20 |               |
|                        | <b>STD</b> | <b>16.97</b>  | <b>0.57</b>  | <b>0.14</b>  | <b>1.27</b> |        | <b>9.60</b>   |
| Nociara                | Mean       | 373.56        | 35.64        | 9.00         | 16.75       | 418.20 |               |
|                        | <b>STD</b> | <b>7.76</b>   | <b>8.50</b>  | <b>0.14</b>  | <b>1.88</b> |        | <b>4.63</b>   |
| Oblica                 | Mean       | 218.89        | 18.83        | 9.48         | 18.95       | 247.20 |               |
|                        | <b>STD</b> | <b>79.05</b>  | <b>12.30</b> | <b>9.24</b>  | <b>2.38</b> |        | <b>39.45</b>  |
| Passalunara            | Mean       | 135.77        | 13.57        | 6.55         | 22.07       | 155.89 |               |
|                        | <b>STD</b> | <b>38.26</b>  | <b>4.78</b>  | <b>0.08</b>  | <b>2.31</b> |        | <b>20.82</b>  |
| Pendolino              | Mean       | 378.49        | 23.39        | 9.33         | 10.49       | 411.21 |               |
|                        | <b>STD</b> | <b>239.75</b> | <b>4.15</b>  | <b>4.07</b>  | <b>0.40</b> |        | <b>136.05</b> |
| Peranzana              | Mean       | 390.27        | 30.86        | 9.80         | 16.74       | 430.93 |               |
|                        | <b>STD</b> | <b>5.66</b>   | <b>0.94</b>  | <b>0.42</b>  | <b>2.84</b> |        | <b>2.88</b>   |
| Picholine de Languedoc | Mean       | 291.97        | 31.45        | 7.56         | 18.87       | 330.98 |               |
|                        | <b>STD</b> | <b>105.03</b> | <b>33.43</b> | <b>6.64</b>  | <b>2.77</b> |        | <b>50.87</b>  |
| Picholine Marocaine    | Mean       | 214.83        | 18.55        | 11.85        | 16.88       | 245.23 |               |
|                        | <b>STD</b> | <b>107.65</b> | <b>2.05</b>  | <b>2.19</b>  | <b>3.58</b> |        | <b>60.93</b>  |
| Picual                 | Mean       | 286.11        | 21.19        | 10.43        | 16.82       | 317.72 |               |
|                        | <b>STD</b> | <b>214.81</b> | <b>9.25</b>  | <b>2.23</b>  | <b>5.40</b> |        | <b>120.76</b> |
| Picudo                 | Mean       | 217.76        | 19.80        | 7.20         | 16.65       | 244.76 |               |
|                        | <b>STD</b> | <b>118.69</b> | <b>13.11</b> | <b>3.54</b>  | <b>1.87</b> |        | <b>63.90</b>  |
| Pizz'e Carroga         | Mean       | 297.16        | 26.59        | 12.49        | 23.32       | 336.24 |               |

|                  |            |               |              |             |             |        |               |
|------------------|------------|---------------|--------------|-------------|-------------|--------|---------------|
|                  | <b>STD</b> | <b>103.09</b> | <b>11.48</b> | <b>1.40</b> | <b>6.28</b> |        | <b>56.03</b>  |
| Rowghani         | Mean       | 286.55        | 46.25        | 7.25        | 16.20       | 340.05 |               |
|                  | <b>STD</b> | <b>4.88</b>   | <b>1.34</b>  | <b>1.48</b> | <b>0.42</b> |        | <b>2.00</b>   |
| Salonenque       | Mean       | 236.59        | 32.29        | 7.76        | 18.21       | 276.63 |               |
|                  | <b>STD</b> | <b>114.56</b> | <b>7.18</b>  | <b>3.17</b> | <b>2.89</b> |        | <b>63.18</b>  |
| Tanche           | Mean       | 302.85        | 20.57        | 9.08        | 19.80       | 332.51 |               |
|                  | <b>STD</b> | <b>105.07</b> | <b>6.68</b>  | <b>5.12</b> | <b>1.88</b> |        | <b>57.26</b>  |
| Tonda iblea      | Mean       | 179.26        | 13.68        | 3.78        | 18.60       | 196.71 |               |
|                  | <b>STD</b> | <b>89.03</b>  | <b>6.55</b>  | <b>2.44</b> | <b>3.38</b> |        | <b>48.85</b>  |
| Uovo di Piccione | Mean       | 157.20        | 18.96        | 2.30        | 18.05       | 178.46 |               |
|                  | <b>STD</b> | <b>10.49</b>  | <b>4.47</b>  | <b>0.14</b> | <b>3.83</b> |        | <b>5.20</b>   |
| Vera             | Mean       | 149.05        | 18.93        | 5.65        | 24.23       | 173.63 |               |
|                  | <b>STD</b> | <b>18.52</b>  | <b>5.20</b>  | <b>0.07</b> | <b>0.15</b> |        | <b>9.52</b>   |
| Verdale          | Mean       | 156.00        | 12.35        | 3.15        | 14.77       | 171.50 |               |
|                  | <b>STD</b> | <b>2.83</b>   | <b>1.20</b>  | <b>0.49</b> | <b>0.78</b> |        | <b>1.20</b>   |
| Zaity            | Mean       | 201.81        | 15.66        | 6.63        | 16.38       | 224.10 |               |
|                  | <b>STD</b> | <b>105.85</b> | <b>10.33</b> | <b>7.60</b> | <b>1.78</b> |        | <b>55.95</b>  |
| Zard             | Mean       | 377.13        | 41.06        | 10.76       | 18.13       | 428.95 |               |
|                  | <b>STD</b> | <b>244.44</b> | <b>33.75</b> | <b>0.06</b> | <b>1.50</b> |        | <b>132.45</b> |

\* Total tocopherols for each cultivar.

\*\* Total STD is a standard deviation of all tocopherols from each STD.

**Table S5.** Descriptive statistics by analysis of the nineteen chemical parameters (expressed as mg kg<sup>-1</sup> of fruit pulp) in 61 cultivars during two consecutive crop seasons.

| Crop season |               | Minimum | Maximum  | Mean    | Std. Error | Std. Deviation |
|-------------|---------------|---------|----------|---------|------------|----------------|
| 2015-2016   | HTYR          | 120.00  | 3549.00  | 700.12  | 64.49      | 580.45         |
|             | TYR           | 97.00   | 1571.00  | 248.28  | 18.65      | 167.85         |
|             | D_OLEU        | 54.00   | 24393.00 | 2108.86 | 528.83     | 4759.51        |
|             | OLEU          | 335.00  | 36755.00 | 6873.11 | 821.90     | 7397.09        |
|             | OLEOC         | 183.00  | 3436.00  | 819.77  | 70.95      | 638.57         |
|             | VER           | 4.00    | 8067.00  | 840.14  | 152.58     | 1373.26        |
|             | RUT           | 120.00  | 4212.00  | 1455.70 | 104.05     | 936.44         |
|             | LUT_7G        | 50.00   | 1308.00  | 430.14  | 30.74      | 276.62         |
|             | LUE           | 20.00   | 593.00   | 131.81  | 12.80      | 115.16         |
|             | API_7G        | 52.00   | 672.00   | 261.25  | 15.05      | 135.45         |
|             | SQU           | 564.00  | 5874.00  | 1799.25 | 107.32     | 965.92         |
|             | CAMP          | 5.00    | 36.00    | 14.31   | 0.71       | 6.41           |
|             | ST_STE        | 1.00    | 57.00    | 9.20    | 0.85       | 7.63           |
|             | $\beta$ _STE  | 56.00   | 530.00   | 245.94  | 11.77      | 105.94         |
|             | $\beta$ _STA  | 2.00    | 80.00    | 25.48   | 2.20       | 19.76          |
|             | $\alpha$ _TOC | 148.00  | 739.00   | 355.69  | 13.57      | 122.15         |
|             | Y_TOC         | 12.00   | 92.00    | 33.00   | 1.80       | 16.22          |
|             | $\beta$ _TOC  | 0.00    | 44.00    | 12.21   | 0.89       | 7.97           |
|             | OCFFW         | 8.00    | 30.00    | 16.16   | 0.38       | 3.43           |
| 2016-2017   | HTYR          | 67.00   | 1416.00  | 309.25  | 24.84      | 267.56         |
|             | TYR           | 30.00   | 1054.00  | 194.45  | 13.44      | 144.72         |
|             | D_OLEU        | 31.00   | 20682.00 | 1127.28 | 273.24     | 2942.84        |
|             | OLEU          | 387.00  | 39766.00 | 9723.17 | 784.30     | 8447.20        |
|             | OLEOC         | 28.00   | 2015.00  | 474.14  | 38.21      | 411.55         |
|             | VER           | 9.00    | 4878.00  | 629.31  | 93.58      | 1007.84        |
|             | RUT           | 85.00   | 6124.00  | 1186.56 | 87.68      | 944.32         |
|             | LUT_7G        | 62.00   | 2386.00  | 415.53  | 31.75      | 341.96         |
|             | LUE           | 10.00   | 395.00   | 65.37   | 5.74       | 61.86          |
|             | API_7G        | 50.00   | 556.00   | 161.39  | 8.50       | 91.53          |
|             | SQU           | 230.00  | 4352.00  | 1524.19 | 94.16      | 1014.08        |
|             | CAMP          | 2.00    | 71.00    | 14.51   | 0.97       | 10.39          |
|             | ST_STE        | 1.00    | 51.00    | 11.45   | 1.13       | 12.14          |
|             | $\beta$ _STE  | 116.00  | 900.00   | 325.84  | 17.60      | 189.60         |
|             | $\beta$ _STA  | 0.00    | 123.00   | 16.84   | 2.03       | 21.84          |
|             | $\alpha$ _TOC | 76.00   | 655.00   | 194.11  | 7.83       | 84.37          |
|             | Y_TOC         | 1.00    | 66.00    | 17.97   | 0.98       | 10.51          |
|             | $\beta$ _TOC  | 0.00    | 25.00    | 8.57    | 0.52       | 5.64           |
|             | OCFFW         | 11.00   | 33.00    | 19.99   | 0.39       | 4.21           |

**Table S6.** Tests of between-subjects effects from general linear model for 61 olive cultivars in two consecutive crop seasons.

|                      | Genotype |          |              | Environment |          |              | Genotype $\times$ Environment |          |              |
|----------------------|----------|----------|--------------|-------------|----------|--------------|-------------------------------|----------|--------------|
|                      | <i>F</i> | <i>P</i> | $\eta^2(\%)$ | <i>F</i>    | <i>P</i> | $\eta^2(\%)$ | <i>F</i>                      | <i>P</i> | $\eta^2(\%)$ |
| HTYR                 | 105.07   | < 0.0001 | 27.74        | 2094.49     | < 0.0001 | 9.22         | 87.48                         | < 0.0001 | 18.09        |
| TYR                  | 12.58    | < 0.0001 | 24.74        | 33.89       | < 0.0001 | 1.11         | 5.38                          | < 0.0001 | 8.29         |
| D_OLEU               | 260.02   | < 0.0001 | 50.29        | 134.04      | < 0.0001 | 0.43         | 226.33                        | < 0.0001 | 34.29        |
| VER                  | 270.11   | < 0.0001 | 65.17        | 24.89       | < 0.0001 | 0.10         | 30.43                         | < 0.0001 | 5.75         |
| RUT                  | 90.09    | < 0.0001 | 26.17        | 161.44      | < 0.0001 | 0.78         | 18.84                         | < 0.0001 | 4.29         |
| LUT_7G               | 67.54    | < 0.0001 | 22.40        | 20.20       | < 0.0001 | 0.11         | 30.21                         | < 0.0001 | 7.85         |
| OLEU                 | 49.59    | < 0.0001 | 33.24        | 116.91      | < 0.0001 | 1.31         | 18.73                         | < 0.0001 | 9.83         |
| API_7G               | 22.13    | < 0.0001 | 12.91        | 348.44      | < 0.0001 | 3.39         | 17.20                         | < 0.0001 | 7.86         |
| OLEOC                | 30.90    | < 0.0001 | 29.53        | 166.30      | < 0.0001 | 2.65         | 11.10                         | < 0.0001 | 8.31         |
| LUE                  | 26.41    | < 0.0001 | 33.73        | 182.25      | < 0.0001 | 3.88         | 8.61                          | < 0.0001 | 8.62         |
| SQU                  | 39.76    | < 0.0001 | 14.93        | 58.88       | < 0.0001 | 0.37         | 31.80                         | < 0.0001 | 9.36         |
| CAMP                 | 10.62    | < 0.0001 | 18.05        | 0.00        | 1.00     | 0.00         | 4.57                          | < 0.0001 | 6.08         |
| ST_STE               | 7.82     | < 0.0001 | 24.36        | 12.17       | < 0.0001 | 0.63         | 7.49                          | < 0.0001 | 18.28        |
| $\beta$ _STE         | 34.42    | < 0.0001 | 13.59        | 161.88      | < 0.0001 | 1.07         | 21.72                         | < 0.0001 | 6.72         |
| $\beta$ _STA         | 34.62    | < 0.0001 | 38.24        | 102.01      | < 0.0001 | 1.88         | 13.13                         | < 0.0001 | 11.36        |
| $\alpha$ _TOC        | 5.90     | < 0.0001 | 7.71         | 285.84      | < 0.0001 | 6.23         | 2.33                          | < 0.0001 | 2.39         |
| Y_TOC                | 5.02     | < 0.0001 | 10.43        | 170.95      | < 0.0001 | 5.92         | 4.93                          | < 0.0001 | 8.02         |
| $\beta$ _TOC         | 18.70    | < 0.0001 | 18.86        | 103.11      | < 0.0001 | 1.73         | 11.59                         | < 0.0001 | 9.16         |
| OCFFW                | 5.58     | < 0.0001 | 2.57         | 115.34      | < 0.0001 | 0.89         | 2.27                          | < 0.0001 | 0.82         |
| Mean of $\eta^2(\%)$ |          |          | 24.98        |             |          | 2.19         |                               |          | 9.76         |

Eta squared ( $\eta^2$ ): percentage of trait variability explained by each factor and the interaction. In bold the traits with highest source effect.

F ratio: variation between samples/variation within the samples. p-value: significance level.
